# Supplementary material for: Temporal variation and photochemical efficiency of species in Symbiodinaceae associated with coral Leptoria phrygia (Scleractinia; Merulinidae) exposed to contrasting temperature regimes
Source: PLoS One. 2019 Jun 28;14(6):e0218801. doi: 10.1371/journal.pone.0218801 (PMC6599219; doi:10.1371/journal.pone.0218801)
Supplement: S1 Dataset — (XLSX) [file pone.0218801.s003.xlsx]

## Sheet: Raw.data
colony	sample	chla.fluorescence	chla.concentration	zoox.density	site	date	clade	percentageD	deltaTemp	meanTemp	meanmaxTemp	meanminTemp
COL2	AO2-1	0.594	0.163863	3.6708	VS	2016-08-01	D	100	2.5	30.4	31.5	29
COL2	AO2-2	0.65	0.869066	3.06926	VS	2016-08-01	D	100	2.5	30.4	31.5	29
COL2	AO2-3	0.616	0.279923	3.70779	VS	2016-08-01	D	100	2.5	30.4	31.5	29
COL2	AO2-4	0.645	0.562132	2.2395	VS	2016-08-01	D	100	2.5	30.4	31.5	29
COL2	AO2-5	0.657	0.305931	3.12576	VS	2016-08-01	D	100	2.5	30.4	31.5	29
COL3	AO3-1	0.674	0.501758	2.07563	VS	2016-08-01	D	100	2.5	30.4	31.5	29
COL3	AO3-2	0.67	1.20155	1.57346	VS	2016-08-01	D	100	2.5	30.4	31.5	29
COL3	AO3-3	0.652	2.19984	0.78981	VS	2016-08-01	D	100	2.5	30.4	31.5	29
COL3	AO3-4	0.65	1.23124	2.18234	VS	2016-08-01	D	100	2.5	30.4	31.5	29
COL3	AO3-5	0.671	0.813682	3.26613	VS	2016-08-01	D	100	2.5	30.4	31.5	29
COL4	AO4-1	0.711	0.124706	3.15397	VS	2016-08-01	D	100	2.5	30.4	31.5	29
COL4	AO4-2	0.651	0.342661	3.17427	VS	2016-08-01	D	100	2.5	30.4	31.5	29
COL4	AO4-3	0.689	0.438734	4.25035	VS	2016-08-01	D	99	2.5	30.4	31.5	29
COL4	AO4-4	0.679	0.208755	2.88054	VS	2016-08-01	D	100	2.5	30.4	31.5	29
COL4	AO4-5	0.657	0.324337	2.41643	VS	2016-08-01	D	99	2.5	30.4	31.5	29
COL5	AO5-1	0.621	0.672922	3.2555	VS	2016-08-01	D	96	2.5	30.4	31.5	29
COL5	AO5-2	0.633	0.874063	3.34805	VS	2016-08-01	D	100	2.5	30.4	31.5	29
COL5	AO5-3	0.672	0.48297	7.07029	VS	2016-08-01	D	97	2.5	30.4	31.5	29
COL5	AO5-4	0.676	1.15527	3.99621	VS	2016-08-01	D	100	2.5	30.4	31.5	29
COL5	AO5-5	0.637	0.746043	3.14523	VS	2016-08-01	D	100	2.5	30.4	31.5	29
COL6	AO6-1	0.644	0.516646	4.17661	VS	2016-08-01	D	99	2.5	30.4	31.5	29
COL6	AO6-2	0.668	0.821731	4.33115	VS	2016-08-01	D	98	2.5	30.4	31.5	29
COL6	AO6-3	0.669	1.03961	3.82625	VS	2016-08-01	D	100	2.5	30.4	31.5	29
COL6	AO6-4	0.685	0.761643	2.28586	VS	2016-08-01	D	100	2.5	30.4	31.5	29
COL6	AO6-5	0.711	0.843451	2.4157	VS	2016-08-01	D	100	2.5	30.4	31.5	29
COL7	AO7	0.634	0.531336	4.90495	VS	2016-08-01	D	100	2.5	30.4	31.5	29
COL9	AO9-1	0.619	0.564368	3.70301	VS	2016-08-01	D	100	2.5	30.4	31.5	29
COL9	AO9-2	0.658	0.583609	3.8344	VS	2016-08-01	D	100	2.5	30.4	31.5	29
COL9	AO9-3	0.573	0.320212	7.56064	VS	2016-08-01	D	100	2.5	30.4	31.5	29
COL9	AO9-4	0.654	1.76986	2.17899	VS	2016-08-01	D	100	2.5	30.4	31.5	29
COL9	AO9-5	0.678	0.77514	3.48488	VS	2016-08-01	D	100	2.5	30.4	31.5	29
COL10	AO10-1	0.682	0.895753	1.90192	VS	2016-08-01	C+D	59	2.5	30.4	31.5	29
COL10	AO10-2	0.674	0.431781	6.21642	VS	2016-08-01	C+D	86	2.5	30.4	31.5	29
COL10	AO10-3	0.637	1.38387	2.04396	VS	2016-08-01	C+D	16	2.5	30.4	31.5	29
COL10	AO10-4	0.676	1.40721	1.45888	VS	2016-08-01	C+D	26	2.5	30.4	31.5	29
COL10	AO10-5	0.685	1.12666	2.49552	VS	2016-08-01	C+D	80	2.5	30.4	31.5	29
COL11	AO11-1	0.642	0.319889	8.5477	VS	2016-08-01	D	98	2.5	30.4	31.5	29
COL11	AO11-2	0.684	0.928922	5.03206	VS	2016-08-01	D	100	2.5	30.4	31.5	29
COL11	AO11-3	0.686	0.907929	7.25048	VS	2016-08-01	D	100	2.5	30.4	31.5	29
COL11	AO11-4	0.656	0.910289	2.97771	VS	2016-08-01	D	100	2.5	30.4	31.5	29
COL11	AO11-5	0.698	0.750704	5.54807	VS	2016-08-01	D	100	2.5	30.4	31.5	29
COL12	AO12-1	0.642	0.56347	2.44885	VS	2016-08-01	D	100	2.5	30.4	31.5	29
COL12	AO12-2	0.635	1.3654	2.06313	VS	2016-08-01	D	100	2.5	30.4	31.5	29
COL12	AO12-3	0.631	0.829673	4.8653	VS	2016-08-01	D	100	2.5	30.4	31.5	29
COL12	AO12-4	0.627	0.910093	5.02469	VS	2016-08-01	D	100	2.5	30.4	31.5	29
COL12	AO12-5	0.672	1.30199	4.04912	VS	2016-08-01	D	100	2.5	30.4	31.5	29
COL13	AO13-1	0.661	0.432866	5.97632	VS	2016-08-01	D	100	2.5	30.4	31.5	29
COL13	AO13-2	0.639	1.02254	2.9597	VS	2016-08-01	D	100	2.5	30.4	31.5	29
COL13	AO13-3	0.645	0.476223	6.11665	VS	2016-08-01	D	100	2.5	30.4	31.5	29
COL13	AO13-4	0.669	0.95667	3.98855	VS	2016-08-01	D	100	2.5	30.4	31.5	29
COL13	AO13-5	0.653	0.609423	4.81325	VS	2016-08-01	D	100	2.5	30.4	31.5	29
COL15	AO15-1	0.664	0.78162	1.7261	VS	2016-08-01	D	100	2.5	30.4	31.5	29
COL15	AO15-2	0.668	0.709814	3.02233	VS	2016-08-01	D	97	2.5	30.4	31.5	29
COL15	AO15-3	0.623	0.840477	1.51374	VS	2016-08-01	D	100	2.5	30.4	31.5	29
COL15	AO15-4	0.607	0.253786	4.57286	VS	2016-08-01	D	97	2.5	30.4	31.5	29
COL15	AO15-5	0.645	0.224365	4.78374	VS	2016-08-01	D	77	2.5	30.4	31.5	29
COL1	AW1-1	0.566	1.28115	2.02505	SS	2016-08-01	C+D	6	0.9	29.8	30.2	29.3
COL1	AW1-2	0.551	0.534901	2.54632	SS	2016-08-01	C+D	34	0.9	29.8	30.2	29.3
COL1	AW1-3	0.624	0.668732	3.36003	SS	2016-08-01	C+D	68	0.9	29.8	30.2	29.3
COL1	AW1-4	0.566	0.333986	3.98363	SS	2016-08-01	C+D	87	0.9	29.8	30.2	29.3
COL1	AW1-5	0.62	0.542507	4.91899	SS	2016-08-01	C+D	88	0.9	29.8	30.2	29.3
COL2	AW2-1	0.583	1.2715	2.1259	SS	2016-08-01	C+D	48	0.9	29.8	30.2	29.3
COL2	AW2-2	0.608	0.443576	4.46634	SS	2016-08-01	C+D	92	0.9	29.8	30.2	29.3
COL2	AW2-3	0.637	0.322892	6.78376	SS	2016-08-01	C+D	98	0.9	29.8	30.2	29.3
COL2	AW2-4	0.594	0.406567	3.48257	SS	2016-08-01	C+D	91	0.9	29.8	30.2	29.3
COL2	AW2-5	0.594	0.257496	6.09922	SS	2016-08-01	C+D	37	0.9	29.8	30.2	29.3
COL3	AW3-1	0.401	0.243504	3.53798	SS	2016-08-01	C+D	100	0.9	29.8	30.2	29.3
COL3	AW3-2	0.42	0.316726	5.5034	SS	2016-08-01	C+D	87	0.9	29.8	30.2	29.3
COL3	AW3-3	0.395	0.140788	7.77727	SS	2016-08-01	C+D	100	0.9	29.8	30.2	29.3
COL3	AW3-4	0.442	0.492503	6.10208	SS	2016-08-01	C+D	99	0.9	29.8	30.2	29.3
COL3	AW3-5	0.613	0.611648	4.41625	SS	2016-08-01	C+D	100	0.9	29.8	30.2	29.3
COL4	AW4-1	0.57	1.11185	1.29242	SS	2016-08-01	C	0	0.9	29.8	30.2	29.3
COL4	AW4-2	0.536	0.931781	1.23098	SS	2016-08-01	C	0	0.9	29.8	30.2	29.3
COL4	AW4-3	0.554	0.542832	1.67428	SS	2016-08-01	C	1	0.9	29.8	30.2	29.3
COL4	AW4-4	0.632	1.18797	2.24827	SS	2016-08-01	C	29	0.9	29.8	30.2	29.3
COL4	AW4-5	0.595	0.994673	3.57827	SS	2016-08-01	C	30	0.9	29.8	30.2	29.3
COL5	AW5-1	0.582	0.205591	3.56454	SS	2016-08-01	C	0	0.9	29.8	30.2	29.3
COL5	AW5-2	0.612	0.361219	1.81858	SS	2016-08-01	C	0	0.9	29.8	30.2	29.3
COL5	AW5-3	0.593	0.269236	1.58665	SS	2016-08-01	C	1	0.9	29.8	30.2	29.3
COL5	AW5-4	0.658	0.415915	1.62466	SS	2016-08-01	C	0	0.9	29.8	30.2	29.3
COL5	AW5-5	0.633	0.859705	1.67907	SS	2016-08-01	C	0	0.9	29.8	30.2	29.3
COL6	AW6-1	0.544	0.749365	0.924619	SS	2016-08-01	C	0	0.9	29.8	30.2	29.3
COL6	AW6-2	0.516	1.45119	1.5374	SS	2016-08-01	C	0	0.9	29.8	30.2	29.3
COL6	AW6-3	0.611	1.26905	1.64375	SS	2016-08-01	C	0	0.9	29.8	30.2	29.3
COL6	AW6-4	0.614	0.430458	2.24811	SS	2016-08-01	C	0	0.9	29.8	30.2	29.3
COL6	AW6-5	0.639	1.48523	2.52183	SS	2016-08-01	C	0	0.9	29.8	30.2	29.3
COL8	AW8-1	0.638	0.174723	5.63072	SS	2016-08-01	D	99	0.9	29.8	30.2	29.3
COL8	AW8-2	0.621	0.494884	5.76361	SS	2016-08-01	D	100	0.9	29.8	30.2	29.3
COL8	AW8-3	0.617	0.673102	4.23761	SS	2016-08-01	D	100	0.9	29.8	30.2	29.3
COL8	AW8-4	0.667	0.994446	2.84982	SS	2016-08-01	D	100	0.9	29.8	30.2	29.3
COL8	AW8-5	0.638	1.02994	3.09864	SS	2016-08-01	D	100	0.9	29.8	30.2	29.3
COL9	AW9-1	0.489	0.365636	1.23797	SS	2016-08-01	C	1	0.9	29.8	30.2	29.3
COL9	AW9-2	0.627	0.706433	1.99103	SS	2016-08-01	C	0	0.9	29.8	30.2	29.3
COL9	AW9-3	0.485	0.503165	1.1665	SS	2016-08-01	C	0	0.9	29.8	30.2	29.3
COL9	AW9-4	0.62	1.15504	2.20348	SS	2016-08-01	C	0	0.9	29.8	30.2	29.3
COL9	AW9-5	0.59	0.449217	6.36691	SS	2016-08-01	C	0	0.9	29.8	30.2	29.3
COL11	AW11-1	0.544	1.99408	0.750543	SS	2016-08-01	C	0	0.9	29.8	30.2	29.3
COL11	AW11-2	0.571	0.450554	3.47059	SS	2016-08-01	C	0	0.9	29.8	30.2	29.3
COL11	AW11-3	0.565	0.600178	2.73309	SS	2016-08-01	C	0	0.9	29.8	30.2	29.3
COL11	AW11-4	0.612	0.860107	3.94151	SS	2016-08-01	C	0	0.9	29.8	30.2	29.3
COL11	AW11-5	0.639	1.42367	3.09513	SS	2016-08-01	C	0	0.9	29.8	30.2	29.3
COL12	AW12-1	0.565	1.38027	1.21597	SS	2016-08-01	C	0	0.9	29.8	30.2	29.3
COL12	AW12-2	0.579	0.856161	3.3707	SS	2016-08-01	C	0	0.9	29.8	30.2	29.3
COL12	AW12-3	0.618	0.460082	8.21083	SS	2016-08-01	C	0	0.9	29.8	30.2	29.3
COL12	AW12-4	0.624	0.666161	8.42987	SS	2016-08-01	C	0	0.9	29.8	30.2	29.3
COL12	AW12-5	0.628	1.35672	3.65258	SS	2016-08-01	C	0	0.9	29.8	30.2	29.3
COL16	AW16-1	0.479	0.769769	1.37289	SS	2016-08-01	C+D	0	0.9	29.8	30.2	29.3
COL16	AW16-2	0.584	0.641174	4.49119	SS	2016-08-01	C+D	0	0.9	29.8	30.2	29.3
COL16	AW16-3	0.596	0.640931	3.21561	SS	2016-08-01	C+D	0	0.9	29.8	30.2	29.3
COL16	AW16-4	0.653	0.670777	4.16901	SS	2016-08-01	C+D	7	0.9	29.8	30.2	29.3
COL16	AW16-5	0.677	1.35705	2.26937	SS	2016-08-01	C+D	87	0.9	29.8	30.2	29.3
COL2	DO2-1	0.635	0.756736	6.55556	VS	2016-12-01	D	100	1.9	26	26.9	25
COL2	DO2-2	0.679	0.655426	8.46508	VS	2016-12-01	D	100	1.9	26	26.9	25
COL2	DO2-3	0.666	1.87579	4.71989	VS	2016-12-01	D	100	1.9	26	26.9	25
COL2	DO2-4	0.687	1.14655	5.29412	VS	2016-12-01	D	99	1.9	26	26.9	25
COL2	DO2-5	0.64	1.36019	3.80167	VS	2016-12-01	D	100	1.9	26	26.9	25
COL3	DO3-1	0.668	1.66801	4.2968	VS	2016-12-01	D	100	1.9	26	26.9	25
COL3	DO3-2	0.661	1.24834	6.1271	VS	2016-12-01	D	100	1.9	26	26.9	25
COL3	DO3-3	0.652	1.72687	5.29624	VS	2016-12-01	D	100	1.9	26	26.9	25
COL3	DO3-4	0.656	0.680526	7.07051	VS	2016-12-01	D	100	1.9	26	26.9	25
COL4	DO4-1	0.639	0.69076	5.2633	VS	2016-12-01	D	100	1.9	26	26.9	25
COL4	DO4-2	0.645	0.971418	4.71667	VS	2016-12-01	D	100	1.9	26	26.9	25
COL4	DO4-3	0.638	1.47901	4.21723	VS	2016-12-01	D	100	1.9	26	26.9	25
COL4	DO4-4	0.669	0.400587	5.52235	VS	2016-12-01	D	97	1.9	26	26.9	25
COL4	DO4-5	0.666	1.1457	4.63076	VS	2016-12-01	D	100	1.9	26	26.9	25
COL5	DO5-1	0.642	0.60645	6.25285	VS	2016-12-01	D	100	1.9	26	26.9	25
COL5	DO5-2	0.663	1.6379	3.74586	VS	2016-12-01	D	100	1.9	26	26.9	25
COL5	DO5-3	0.66	0.334745	3.583	VS	2016-12-01	D	100	1.9	26	26.9	25
COL5	DO5-4	0.662	1.66752	2.29413	VS	2016-12-01	D	100	1.9	26	26.9	25
COL5	DO5-5	0.644	1.03541	3.58615	VS	2016-12-01	D	100	1.9	26	26.9	25
COL6	DO6-1	0.672	0.191323	4.48331	VS	2016-12-01	D	100	1.9	26	26.9	25
COL6	DO6-2	0.649	1.45931	2.43016	VS	2016-12-01	D	100	1.9	26	26.9	25
COL6	DO6-3	0.67	0.625683	4.99776	VS	2016-12-01	D	100	1.9	26	26.9	25
COL6	DO6-4	0.655	0.897783	4.89892	VS	2016-12-01	D	100	1.9	26	26.9	25
COL6	DO6-5	0.674	1.53881	2.48871	VS	2016-12-01	D	100	1.9	26	26.9	25
COL7	DO7-1	0.65	1.22247	4.00728	VS	2016-12-01	D	100	1.9	26	26.9	25
COL7	DO7-2	0.664	1.10537	6.75251	VS	2016-12-01	D	100	1.9	26	26.9	25
COL7	DO7-3	0.67	2.95132	2.64775	VS	2016-12-01	D	100	1.9	26	26.9	25
COL7	DO7-4	0.66	1.9385	3.83246	VS	2016-12-01	D	100	1.9	26	26.9	25
COL7	DO7-5	0.669	2.04001	2.87631	VS	2016-12-01	D	100	1.9	26	26.9	25
COL9	DO9-1	0.646	0.300196	5.67391	VS	2016-12-01	D	100	1.9	26	26.9	25
COL9	DO9-2	0.648	2.80739	4.61762	VS	2016-12-01	D	100	1.9	26	26.9	25
COL9	DO9-3	0.638	1.16906	3.80241	VS	2016-12-01	D	100	1.9	26	26.9	25
COL9	DO9-4	0.659	1.61102	3.15555	VS	2016-12-01	D	100	1.9	26	26.9	25
COL9	DO9-5	0.65	1.43631	3.19913	VS	2016-12-01	D	100	1.9	26	26.9	25
COL10	DO10-1	0.709	0.687336	7.75472	VS	2016-12-01	C+D	100	1.9	26	26.9	25
COL10	DO10-2	0.692	0.962581	8.52101	VS	2016-12-01	C+D	95	1.9	26	26.9	25
COL10	DO10-3	0.647	1.18652	3.14592	VS	2016-12-01	C+D	81	1.9	26	26.9	25
COL10	DO10-4	0.664	1.45193	4.58938	VS	2016-12-01	C+D	93	1.9	26	26.9	25
COL10	DO10-5	0.733	2.16803	2.04666	VS	2016-12-01	C+D	71	1.9	26	26.9	25
COL11	DO11-1	0.645	0.491983	4.45172	VS	2016-12-01	D	94	1.9	26	26.9	25
COL11	DO11-2	0.69	1.0334	2.70858	VS	2016-12-01	D	100	1.9	26	26.9	25
COL11	DO11-3	0.688	1.96273	2.85118	VS	2016-12-01	D	100	1.9	26	26.9	25
COL11	DO11-4	0.665	2.01123	2.53834	VS	2016-12-01	D	100	1.9	26	26.9	25
COL11	DO11-5	0.709	2.05548	1.95548	VS	2016-12-01	D	99	1.9	26	26.9	25
COL12	DO12-1	0.678	0.601472	3.88981	VS	2016-12-01	D	99	1.9	26	26.9	25
COL12	DO12-2	0.652	0.734988	4.43839	VS	2016-12-01	D	100	1.9	26	26.9	25
COL12	DO12-3	0.649	0.818364	2.74711	VS	2016-12-01	D	100	1.9	26	26.9	25
COL12	DO12-4	0.661	0.641351	8.34414	VS	2016-12-01	D	100	1.9	26	26.9	25
COL12	DO12-5	0.641	0.674786	6.3973	VS	2016-12-01	D	98	1.9	26	26.9	25
COL13	DO13-1	0.673	1.26368	3.77715	VS	2016-12-01	D	100	1.9	26	26.9	25
COL13	DO13-2	0.67	1.15988	6.80353	VS	2016-12-01	D	98	1.9	26	26.9	25
COL13	DO13-3	0.709	1.10037	6.13717	VS	2016-12-01	D	100	1.9	26	26.9	25
COL13	DO13-4	0.689	0.396889	4.57425	VS	2016-12-01	D	100	1.9	26	26.9	25
COL13	DO13-5	0.653	0.574767	7.40387	VS	2016-12-01	D	100	1.9	26	26.9	25
COL15	DO15-1	0.635	0.996193	3.1106	VS	2016-12-01	D	100	1.9	26	26.9	25
COL15	DO15-2	0.562	1.44751	3.25043	VS	2016-12-01	D	100	1.9	26	26.9	25
COL15	DO15-3	0.638	1.55787	3.59286	VS	2016-12-01	D	100	1.9	26	26.9	25
COL15	DO15-4	0.621	1.30547	4.37317	VS	2016-12-01	D	100	1.9	26	26.9	25
COL15	DO15-5	0.682	2.51957	3.24087	VS	2016-12-01	D	100	1.9	26	26.9	25
COL1	DW1-1	0.652	1.49655	2.71724	SS	2016-12-01	C+D	4	1.2	25.2	25.8	24.6
COL1	DW1-2	0.655	2.21081	2.28078	SS	2016-12-01	C+D	50	1.2	25.2	25.8	24.6
COL1	DW1-3	0.615	0.791676	6.13831	SS	2016-12-01	C+D	79	1.2	25.2	25.8	24.6
COL1	DW1-4	0.635	1.29974	3.57741	SS	2016-12-01	C+D	47	1.2	25.2	25.8	24.6
COL1	DW1-5	0.633	2.32447	2.61249	SS	2016-12-01	C+D	99	1.2	25.2	25.8	24.6
COL2	DW2-1	0.631	2.63991	3.40288	SS	2016-12-01	C+D	60	1.2	25.2	25.8	24.6
COL2	DW2-2	0.628	1.24181	6.20936	SS	2016-12-01	C+D	87	1.2	25.2	25.8	24.6
COL2	DW2-3	0.589	2.07567	2.17424	SS	2016-12-01	C+D	99	1.2	25.2	25.8	24.6
COL2	DW2-4	0.629	1.53277	3.20051	SS	2016-12-01	C+D	95	1.2	25.2	25.8	24.6
COL2	DW2-5	0.637	2.94517	2.52821	SS	2016-12-01	C+D	100	1.2	25.2	25.8	24.6
COL3	DW3-1	0.579	2.70146	2.41878	SS	2016-12-01	C+D	95	1.2	25.2	25.8	24.6
COL3	DW3-2	0.579	1.26256	2.38953	SS	2016-12-01	C+D	95	1.2	25.2	25.8	24.6
COL3	DW3-3	0.61	0.976349	4.53789	SS	2016-12-01	C+D	74	1.2	25.2	25.8	24.6
COL3	DW3-4	0.634	1.51637	6.45271	SS	2016-12-01	C+D	99	1.2	25.2	25.8	24.6
COL3	DW3-5	0.609	1.80403	5.14207	SS	2016-12-01	C+D	98	1.2	25.2	25.8	24.6
COL4	DW4-1	0.665	1.53229	8.05129	SS	2016-12-01	C	0	1.2	25.2	25.8	24.6
COL4	DW4-2	0.647	1.12798	4.37182	SS	2016-12-01	C	22	1.2	25.2	25.8	24.6
COL4	DW4-3	0.633	0.697152	6.46166	SS	2016-12-01	C	75	1.2	25.2	25.8	24.6
COL4	DW4-4	0.624	1.58076	2.94452	SS	2016-12-01	C	8	1.2	25.2	25.8	24.6
COL4	DW4-5	0.653	2.27697	3.13697	SS	2016-12-01	C	0	1.2	25.2	25.8	24.6
COL5	DW5-1	0.624	1.92792	4.47534	SS	2016-12-01	C	50	1.2	25.2	25.8	24.6
COL5	DW5-2	0.638	2.32808	3.46096	SS	2016-12-01	C	0	1.2	25.2	25.8	24.6
COL5	DW5-3	0.626	3.33922	4.38645	SS	2016-12-01	C	0	1.2	25.2	25.8	24.6
COL5	DW5-4	0.646	1.71213	7.28278	SS	2016-12-01	C	0	1.2	25.2	25.8	24.6
COL5	DW5-5	0.633	1.11029	2.95069	SS	2016-12-01	C	3	1.2	25.2	25.8	24.6
COL6	DW6-1	0.632	3.40403	1.47047	SS	2016-12-01	C	0	1.2	25.2	25.8	24.6
COL6	DW6-2	0.642	2.32378	2.65936	SS	2016-12-01	C	0	1.2	25.2	25.8	24.6
COL6	DW6-3	0.657	1.80817	1.86241	SS	2016-12-01	C	0	1.2	25.2	25.8	24.6
COL6	DW6-4	0.635	3.27177	2.6688	SS	2016-12-01	C	0	1.2	25.2	25.8	24.6
COL6	DW6-5	0.673	2.78359	2.05672	SS	2016-12-01	C	0	1.2	25.2	25.8	24.6
COL7	DW7-1	0.608	1.22434	3.26531	SS	2016-12-01	C	0	1.2	25.2	25.8	24.6
COL7	DW7-2	0.64	2.91037	1.49438	SS	2016-12-01	C	0	1.2	25.2	25.8	24.6
COL7	DW7-3	0.614	1.32472	4.11596	SS	2016-12-01	C	0	1.2	25.2	25.8	24.6
COL7	DW7-4	0.581	2.52444	2.89381	SS	2016-12-01	C	0	1.2	25.2	25.8	24.6
COL7	DW7-5	0.629	1.72631	3.19451	SS	2016-12-01	C	0	1.2	25.2	25.8	24.6
COL8	DW8-1	0.638	0.638882	4.14714	SS	2016-12-01	D	100	1.2	25.2	25.8	24.6
COL8	DW8-2	0.635	1.36363	6.19161	SS	2016-12-01	D	100	1.2	25.2	25.8	24.6
COL8	DW8-3	0.585	1.07927	3.95517	SS	2016-12-01	D	100	1.2	25.2	25.8	24.6
COL8	DW8-4	0.652	1.68823	2.65082	SS	2016-12-01	D	100	1.2	25.2	25.8	24.6
COL8	DW8-5	0.612	1.82888	1.45107	SS	2016-12-01	D	100	1.2	25.2	25.8	24.6
COL9	DW9-1	0.648	1.70039	2.51469	SS	2016-12-01	C	0	1.2	25.2	25.8	24.6
COL9	DW9-2	0.648	1.6799	3.41148	SS	2016-12-01	C	0	1.2	25.2	25.8	24.6
COL9	DW9-3	0.668	1.98152	2.61881	SS	2016-12-01	C	0	1.2	25.2	25.8	24.6
COL9	DW9-4	0.665	2.7412	2.25118	SS	2016-12-01	C	0	1.2	25.2	25.8	24.6
COL9	DW9-5	0.649	2.29239	2.94495	SS	2016-12-01	C	0	1.2	25.2	25.8	24.6
COL10	DW10-1	0.632	2.19365	1.48111	SS	2016-12-01	C	0	1.2	25.2	25.8	24.6
COL10	DW10-2	0.624	1.30784	5.24544	SS	2016-12-01	C	0	1.2	25.2	25.8	24.6
COL10	DW10-3	0.635	0.893248	7.45214	SS	2016-12-01	C	0	1.2	25.2	25.8	24.6
COL10	DW10-4	0.633	2.83533	2.50916	SS	2016-12-01	C	0	1.2	25.2	25.8	24.6
COL10	DW10-5	0.634	2.29502	1.53803	SS	2016-12-01	C	0	1.2	25.2	25.8	24.6
COL12	DW12-1	0.668	2.9626	2.67469	SS	2016-12-01	C	0	1.2	25.2	25.8	24.6
COL12	DW12-2	0.682	2.63074	3.02311	SS	2016-12-01	C	0	1.2	25.2	25.8	24.6
COL12	DW12-3	0.664	4.4649	1.72286	SS	2016-12-01	C	0	1.2	25.2	25.8	24.6
COL12	DW12-4	0.642	3.07546	2.96441	SS	2016-12-01	C	0	1.2	25.2	25.8	24.6
COL12	DW12-5	0.648	2.06139	5.109	SS	2016-12-01	C	0	1.2	25.2	25.8	24.6
COL16	DW16-1	0.631	2.16113	2.62059	SS	2016-12-01	C+D	0	1.2	25.2	25.8	24.6
COL16	DW16-2	0.642	2.43877	3.40216	SS	2016-12-01	C+D	6	1.2	25.2	25.8	24.6
COL16	DW16-3	0.608	1.56233	2.29639	SS	2016-12-01	C+D	7	1.2	25.2	25.8	24.6
COL16	DW16-4	0.619	1.73877	2.307	SS	2016-12-01	C+D	15	1.2	25.2	25.8	24.6
COL16	DW16-5	0.702	1.75362	3.7848	SS	2016-12-01	C+D	92	1.2	25.2	25.8	24.6
COL2	MO2-1	0.657	0.52979	3.91381	VS	2017-03-01	D	100	2	26.8	27.8	25.8
COL2	MO2-2	0.652	0.205248	5.13287	VS	2017-03-01	D	100	2	26.8	27.8	25.8
COL2	MO2-3	0.682	0.609549	4.15002	VS	2017-03-01	D	100	2	26.8	27.8	25.8
COL2	MO2-4	0.651	0.858792	4.30778	VS	2017-03-01	D	100	2	26.8	27.8	25.8
COL2	MO2-5	0.681	0.935362	2.98361	VS	2017-03-01	D	100	2	26.8	27.8	25.8
COL3	MO3-1	0.658	0.162147	3.18019	VS	2017-03-01	D	100	2	26.8	27.8	25.8
COL3	MO3-2	0.671	0.46561	5.65418	VS	2017-03-01	D	100	2	26.8	27.8	25.8
COL3	MO3-3	0.68	0.32652	3.76042	VS	2017-03-01	D	100	2	26.8	27.8	25.8
COL3	MO3-4	0.707	1.23821	1.40874	VS	2017-03-01	D	100	2	26.8	27.8	25.8
COL3	MO3-5	0.682	0.416466	7.1715	VS	2017-03-01	D	100	2	26.8	27.8	25.8
COL4	MO4-1	0.781	0.64059	4.72362	VS	2017-03-01	D	100	2	26.8	27.8	25.8
COL4	MO4-2	0.788	1.1271	2.67751	VS	2017-03-01	D	100	2	26.8	27.8	25.8
COL4	MO4-3	0.764	1.39209	2.59508	VS	2017-03-01	D	100	2	26.8	27.8	25.8
COL4	MO4-4	0.606	0.762333	3.00635	VS	2017-03-01	D	100	2	26.8	27.8	25.8
COL4	MO4-5	0.656	0.676978	3.12425	VS	2017-03-01	D	100	2	26.8	27.8	25.8
COL5	MO5-1	0.647	0.54397	3.96501	VS	2017-03-01	D	100	2	26.8	27.8	25.8
COL5	MO5-2	0.624	0.64201	2.25979	VS	2017-03-01	D	100	2	26.8	27.8	25.8
COL5	MO5-3	0.618	0.795685	3.03332	VS	2017-03-01	D	100	2	26.8	27.8	25.8
COL5	MO5-4	0.612	0.658974	4.51132	VS	2017-03-01	D	100	2	26.8	27.8	25.8
COL5	MO5-5	0.598	0.75639	5.56844	VS	2017-03-01	D	99	2	26.8	27.8	25.8
COL6	MO6-1	0.597	0.371822	4.4421	VS	2017-03-01	D	100	2	26.8	27.8	25.8
COL6	MO6-2	0.678	0.375867	5.32683	VS	2017-03-01	D	100	2	26.8	27.8	25.8
COL6	MO6-3	0.655	0.499962	5.48487	VS	2017-03-01	D	100	2	26.8	27.8	25.8
COL6	MO6-4	0.639	0.292057	6.40271	VS	2017-03-01	D	100	2	26.8	27.8	25.8
COL6	MO6-5	0.65	0.363648	7.56166	VS	2017-03-01	D	100	2	26.8	27.8	25.8
COL7	MO7-1	0.667	0.473748	2.96433	VS	2017-03-01	D	100	2	26.8	27.8	25.8
COL7	MO7-2	0.685	1.08794	3.94266	VS	2017-03-01	D	100	2	26.8	27.8	25.8
COL7	MO7-3	0.685	0.69123	5.33644	VS	2017-03-01	D	100	2	26.8	27.8	25.8
COL7	MO7-4	0.688	0.855425	3.31061	VS	2017-03-01	D	100	2	26.8	27.8	25.8
COL7	MO7-5	0.706	0.470691	3.62081	VS	2017-03-01	D	100	2	26.8	27.8	25.8
COL9	MO9-1	0.659	0.453244	7.4015	VS	2017-03-01	D	100	2	26.8	27.8	25.8
COL9	MO9-2	0.661	0.605289	4.24712	VS	2017-03-01	D	100	2	26.8	27.8	25.8
COL9	MO9-3	0.658	0.591955	4.94135	VS	2017-03-01	D	100	2	26.8	27.8	25.8
COL9	MO9-4	0.662	1.22799	2.71605	VS	2017-03-01	D	100	2	26.8	27.8	25.8
COL9	MO9-5	0.698	1.73228	1.58496	VS	2017-03-01	D	100	2	26.8	27.8	25.8
COL10	MO10-1	0.638	0.649803	0.351577	VS	2017-03-01	C+D	100	2	26.8	27.8	25.8
COL10	MO10-2	0.682	1.98117	2.11602	VS	2017-03-01	C+D	80	2	26.8	27.8	25.8
COL10	MO10-3	0.712	1.04184	2.6233	VS	2017-03-01	C+D	60	2	26.8	27.8	25.8
COL10	MO10-4	0.694	0.89366	4.2722	VS	2017-03-01	C+D	46	2	26.8	27.8	25.8
COL10	MO10-5	0.701	1.39434	4.73421	VS	2017-03-01	C+D	63	2	26.8	27.8	25.8
COL11	MO11-1	0.65	0.768366	2.26138	VS	2017-03-01	D	98	2	26.8	27.8	25.8
COL11	MO11-2	0.67	0.861824	3.54722	VS	2017-03-01	D	100	2	26.8	27.8	25.8
COL11	MO11-3	0.712	1.17355	2.32532	VS	2017-03-01	D	100	2	26.8	27.8	25.8
COL11	MO11-4	0.697	0.605427	3.49285	VS	2017-03-01	D	100	2	26.8	27.8	25.8
COL11	MO11-5	0.705	1.06744	3.16639	VS	2017-03-01	D	100	2	26.8	27.8	25.8
COL12	MO12-1	0.657	1.67889	5.48792	VS	2017-03-01	D	100	2	26.8	27.8	25.8
COL12	MO12-2	0.669	0.891043	2.53003	VS	2017-03-01	D	100	2	26.8	27.8	25.8
COL12	MO12-3	0.663	0.938831	4.55973	VS	2017-03-01	D	100	2	26.8	27.8	25.8
COL12	MO12-4	0.614	0.846017	3.37997	VS	2017-03-01	D	100	2	26.8	27.8	25.8
COL12	MO12-5	0.683	1.14874	3.30262	VS	2017-03-01	D	100	2	26.8	27.8	25.8
COL13	MO13-1	0.633	0.934159	4.48868	VS	2017-03-01	D	100	2	26.8	27.8	25.8
COL13	MO13-2	0.636	0.6734	5.32379	VS	2017-03-01	D	100	2	26.8	27.8	25.8
COL13	MO13-3	0.648	1.02779	3.76842	VS	2017-03-01	D	99	2	26.8	27.8	25.8
COL13	MO13-4	0.667	0.728646	6.42865	VS	2017-03-01	D	100	2	26.8	27.8	25.8
COL13	MO13-5	0.66	0.33926	5.32369	VS	2017-03-01	D	100	2	26.8	27.8	25.8
COL15	MO15-1	0.646	0.782413	3.81564	VS	2017-03-01	D	98	2	26.8	27.8	25.8
COL15	MO15-2	0.646	0.372314	5.63111	VS	2017-03-01	D	100	2	26.8	27.8	25.8
COL15	MO15-3	0.674	0.903887	3.31219	VS	2017-03-01	D	100	2	26.8	27.8	25.8
COL15	MO15-4	0.661	0.39189	7.30061	VS	2017-03-01	D	74	2	26.8	27.8	25.8
COL15	MO15-5	0.611	0.564116	3.40678	VS	2017-03-01	D	30	2	26.8	27.8	25.8
COL1	MW1-1	0.655	0.488176	7.03636	SS	2017-03-01	C+D	5	1.3	25.2	26	24.6
COL1	MW1-2	0.643	0.440213	4.90628	SS	2017-03-01	C+D	95	1.3	25.2	26	24.6
COL1	MW1-3	0.687	0.509827	2.69997	SS	2017-03-01	C+D	62	1.3	25.2	26	24.6
COL1	MW1-4	0.646	0.618918	3.95069	SS	2017-03-01	C+D	67	1.3	25.2	26	24.6
COL1	MW1-5	0.662	0.311553	9.46893	SS	2017-03-01	C+D	86	1.3	25.2	26	24.6
COL2	MW2-1	0.606	0.686427	5.52028	SS	2017-03-01	C+D	64	1.3	25.2	26	24.6
COL2	MW2-2	0.693	0.960273	6.12477	SS	2017-03-01	C+D	84	1.3	25.2	26	24.6
COL2	MW2-3	0.646	0.863873	8.07038	SS	2017-03-01	C+D	100	1.3	25.2	26	24.6
COL2	MW2-4	0.676	0.518813	6.64775	SS	2017-03-01	C+D	98	1.3	25.2	26	24.6
COL2	MW2-5	0.654	0.668771	4.84806	SS	2017-03-01	C+D	99	1.3	25.2	26	24.6
COL3	MW3-1	0.624	0.816235	3.80683	SS	2017-03-01	C+D	32	1.3	25.2	26	24.6
COL3	MW3-2	0.638	0.763796	3.20696	SS	2017-03-01	C+D	40	1.3	25.2	26	24.6
COL3	MW3-3	0.639	0.565169	4.70809	SS	2017-03-01	C+D	91	1.3	25.2	26	24.6
COL3	MW3-4	0.643	1.48097	1.83574	SS	2017-03-01	C+D	68	1.3	25.2	26	24.6
COL3	MW3-5	0.681	0.847082	3.91378	SS	2017-03-01	C+D	100	1.3	25.2	26	24.6
COL4	MW4-1	0.623	2.05485	1.60065	SS	2017-03-01	C	0	1.3	25.2	26	24.6
COL4	MW4-2	0.657	1.68011	3.25398	SS	2017-03-01	C	0	1.3	25.2	26	24.6
COL4	MW4-3	0.686	2.00066	3.72751	SS	2017-03-01	C	3	1.3	25.2	26	24.6
COL4	MW4-4	0.681	1.73439	3.46786	SS	2017-03-01	C	10	1.3	25.2	26	24.6
COL4	MW4-5	0.667	2.02632	4.78777	SS	2017-03-01	C	0	1.3	25.2	26	24.6
COL5	MW5-1	0.666	1.18285	2.85332	SS	2017-03-01	C	0	1.3	25.2	26	24.6
COL5	MW5-2	0.672	1.13727	4.59897	SS	2017-03-01	C	0	1.3	25.2	26	24.6
COL5	MW5-3	0.683	1.10035	3.41876	SS	2017-03-01	C	0	1.3	25.2	26	24.6
COL5	MW5-4	0.656	1.14281	4.06302	SS	2017-03-01	C	0	1.3	25.2	26	24.6
COL5	MW5-5	0.66	0.995268	2.75985	SS	2017-03-01	C	0	1.3	25.2	26	24.6
COL6	MW6-1	0.632	0.795031	2.56763	SS	2017-03-01	C	0	1.3	25.2	26	24.6
COL6	MW6-2	0.63	0.85821	1.88218	SS	2017-03-01	C	0	1.3	25.2	26	24.6
COL6	MW6-3	0.653	1.06648	2.63385	SS	2017-03-01	C	0	1.3	25.2	26	24.6
COL6	MW6-4	0.678	0.960599	2.66873	SS	2017-03-01	C	0	1.3	25.2	26	24.6
COL6	MW6-5	0.671	1.23851	2.9824	SS	2017-03-01	C	0	1.3	25.2	26	24.6
COL7	MW7-1	0.668	0.814864	3.26375	SS	2017-03-01	C	0	1.3	25.2	26	24.6
COL7	MW7-2	0.648	1.13911	2.71203	SS	2017-03-01	C	0	1.3	25.2	26	24.6
COL7	MW7-3	0.65	1.02486	2.27971	SS	2017-03-01	C	0	1.3	25.2	26	24.6
COL7	MW7-4	0.68	1.24992	3.18738	SS	2017-03-01	C	0	1.3	25.2	26	24.6
COL7	MW7-5	0.686	0.688935	4.51354	SS	2017-03-01	C	1	1.3	25.2	26	24.6
COL8	MW8-1	0.648	0.299855	8.78913	SS	2017-03-01	D	100	1.3	25.2	26	24.6
COL8	MW8-2	0.651	1.72643	1.75043	SS	2017-03-01	D	100	1.3	25.2	26	24.6
COL8	MW8-3	0.648	1.27785	3.88257	SS	2017-03-01	D	100	1.3	25.2	26	24.6
COL8	MW8-4	0.66	0.433027	7.79261	SS	2017-03-01	D	100	1.3	25.2	26	24.6
COL8	MW8-5	0.676	0.403238	4.09622	SS	2017-03-01	D	100	1.3	25.2	26	24.6
COL9	MW9-1	0.65	1.23168	0.933473	SS	2017-03-01	C	0	1.3	25.2	26	24.6
COL9	MW9-2	0.68	2.36504	1.66743	SS	2017-03-01	C	0	1.3	25.2	26	24.6
COL9	MW9-3	0.666	1.07983	3.75188	SS	2017-03-01	C	0	1.3	25.2	26	24.6
COL9	MW9-4	0.624	1.35122	1.77237	SS	2017-03-01	C	0	1.3	25.2	26	24.6
COL9	MW9-5	0.699	1.40694	2.38884	SS	2017-03-01	C	0	1.3	25.2	26	24.6
COL10	MW10-1	0.621	1.05415	3.00119	SS	2017-03-01	C	0	1.3	25.2	26	24.6
COL10	MW10-2	0.665	0.533119	8.93144	SS	2017-03-01	C	0	1.3	25.2	26	24.6
COL10	MW10-3	0.641	1.07517	2.89022	SS	2017-03-01	C	0	1.3	25.2	26	24.6
COL10	MW10-4	0.655	1.14716	5.47536	SS	2017-03-01	C	0	1.3	25.2	26	24.6
COL10	MW10-5	0.66	0.794025	6.87432	SS	2017-03-01	C	0	1.3	25.2	26	24.6
COL11	MW11-1	0.679	1.06017	6.90827	SS	2017-03-01	C	0	1.3	25.2	26	24.6
COL11	MW11-2	0.705	1.50817	3.10202	SS	2017-03-01	C	0	1.3	25.2	26	24.6
COL11	MW11-3	0.687	1.03481	3.79027	SS	2017-03-01	C	0	1.3	25.2	26	24.6
COL11	MW11-4	0.688	1.23617	3.24365	SS	2017-03-01	C	2	1.3	25.2	26	24.6
COL11	MW11-5	0.698	1.49321	2.84051	SS	2017-03-01	C	0	1.3	25.2	26	24.6
COL16	MW16-1	0.68	1.49003	1.64854	SS	2017-03-01	C+D	0	1.3	25.2	26	24.6
COL16	MW16-2	0.656	2.16454	2.13886	SS	2017-03-01	C+D	3	1.3	25.2	26	24.6
COL16	MW16-3	0.624	0.912197	3.67551	SS	2017-03-01	C+D	0	1.3	25.2	26	24.6
COL16	MW16-4	0.689	0.632586	1.42187	SS	2017-03-01	C+D	79	1.3	25.2	26	24.6
COL16	MW16-5	0.646	1.69223	3.00699	SS	2017-03-01	C+D	100	1.3	25.2	26	24.6

## Sheet: Max.Photcal.efficiency
Maximum photochemical efficiency
Mean values per sampling						Mean values per site
	date	site	mean	sd			site	mean	sd
1	2016-08-01	VS	0.655339	0.0271054		1	VS	0.661326	0.0309525
3	2016-12-01	VS	0.661034	0.0250255		2	SS	0.627109	0.0518924
5	2017-03-01	VS	0.6672	0.0381539
2	2016-08-01	SS	0.582345	0.0643213
4	2016-12-01	SS	0.63465	0.0242598
6	2017-03-01	SS	0.6606	0.0223601
Mean values in VS						Mean values in SS
Sampling time: Aug 16						Sampling time: Aug 16
	colony	mean	sd				colony	mean	sd
1	COL2	0.6324	0.0265387			1	COL1	0.5854	0.0339971
2	COL3	0.6634	0.0114368			2	COL2	0.6032	0.0208734
3	COL4	0.6774	0.0243885			3	COL3	0.4542	0.0906515
4	COL5	0.6478	0.0246718			4	COL4	0.5774	0.0374406
5	COL6	0.6754	0.0247043			5	COL5	0.6156	0.0306317
6	COL7	0.634	NA			6	COL6	0.5848	0.0521411
7	COL9	0.6364	0.0413195			7	COL8	0.6362	0.0197155
8	COL10	0.6708	0.0194088			8	COL9	0.5622	0.070055
9	COL11	0.6732	0.0232637			9	COL11	0.5862	0.0384539
10	COL12	0.6414	0.0179806			10	COL12	0.6028	0.0287698
11	COL13	0.6534	0.0120333			11	COL16	0.5978	0.0768551
12	COL15	0.6414	0.0262355
Sampling time: Dec 16						Sampling time: Dec 16
	colony	mean	sd				colony	mean	sd
1	COL2	0.6614	0.0231366			1	COL1	0.638	0.0161864
2	COL3	0.65925	0.00689807			2	COL2	0.6228	0.0192146
3	COL4	0.6514	0.0149766			3	COL3	0.6022	0.0234243
4	COL5	0.6542	0.0103053			4	COL4	0.6444	0.0162111
5	COL6	0.664	0.0112472			5	COL5	0.6334	0.00898888
6	COL7	0.6626	0.00811172			6	COL6	0.6478	0.0170792
7	COL9	0.6482	0.00756307			7	COL7	0.6144	0.0225011
8	COL10	0.689	0.034402			8	COL8	0.6244	0.0262926
9	COL11	0.6794	0.0247649			9	COL9	0.6556	0.010015
10	COL12	0.6562	0.0141315			10	COL10	0.6316	0.00439318
11	COL13	0.6788	0.0211707			11	COL12	0.6608	0.0160375
12	COL15	0.6276	0.0432123			12	COL16	0.6404	0.0367192
Sampling time: Mar 17						Sampling time: Mar 17
	colony	mean	sd				colony	mean	sd
1	COL2	0.6646	0.0155981			1	COL1	0.6586	0.0175585
2	COL3	0.6796	0.0180083			2	COL2	0.655	0.0330454
3	COL4	0.719	0.0827164			3	COL3	0.645	0.0213659
4	COL5	0.6198	0.0180055			4	COL4	0.6628	0.025024
5	COL6	0.6438	0.0297775			5	COL5	0.6674	0.0106207
6	COL7	0.6862	0.0138456			6	COL6	0.6528	0.021902
7	COL9	0.6676	0.0170675			7	COL7	0.6664	0.0171697
8	COL10	0.6854	0.0286496			8	COL8	0.6566	0.011908
9	COL11	0.6868	0.0260135			9	COL9	0.6638	0.0286391
10	COL12	0.6572	0.0260038			10	COL10	0.6484	0.0177426
11	COL13	0.6488	0.0147547			11	COL11	0.6914	0.0101637
12	COL15	0.6476	0.0235648			12	COL16	0.659	0.0261916

## Sheet: Symbiont.dens
Symbiont density
Mean values per sampling						Mean values per site
	date	site	mean	sd			site	mean	sd
1	2016-08-01	VS	3.68734	1.65866		1	VS	4.10171	1.65079
3	2016-12-01	VS	4.54147	1.68362		2	SS	3.60133	1.85539
5	2017-03-01	VS	4.05603	1.52547
2	2016-08-01	SS	3.36795	1.92797
4	2016-12-01	SS	3.48757	1.60391
6	2017-03-01	SS	3.92903	2.00116
Mean values in VS						Mean values in SS
Sampling time: Aug 16						Sampling time: Aug 16
	colony	mean	sd				colony	mean	sd
1	COL2	3.16262	0.595332			1	COL1	3.3668	1.14709
2	COL3	1.97747	0.906369			2	COL2	4.59156	1.89762
3	COL4	3.17511	0.674344			3	COL3	5.46739	1.62536
4	COL5	4.16305	1.65859			4	COL4	2.00484	0.968327
5	COL6	3.40711	0.982569			5	COL5	2.0547	0.848595
6	COL7	4.90495	NA			6	COL6	1.77514	0.628176
7	COL9	4.15238	2.01613			7	COL8	4.31608	1.36582
8	COL10	2.82334	1.93252			8	COL9	2.59318	2.15798
9	COL11	5.8712	2.13582			9	COL11	2.79817	1.22929
10	COL12	3.69022	1.36738			10	COL12	4.97599	3.19608
11	COL13	4.7709	1.33776			11	COL16	3.10361	1.30042
12	COL15	3.12376	1.53389
Sampling time: Dec 16						Sampling time: Dec 16
	colony	mean	sd				colony	mean	sd
1	COL2	5.76727	1.80859			1	COL1	3.46525	1.56904
2	COL3	5.69766	1.18218			2	COL2	3.50304	1.5923
3	COL4	4.87006	0.52132			3	COL3	4.1882	1.76962
4	COL5	3.8924	1.44371			4	COL4	4.99325	2.21004
5	COL6	3.85977	1.29299			5	COL5	4.51124	1.67606
6	COL7	4.02326	1.63501			6	COL6	2.14355	0.519991
7	COL9	4.08972	1.06498			7	COL7	2.9928	0.952825
8	COL10	5.21154	2.83243			8	COL8	3.67916	1.7769
9	COL11	2.90106	0.931369			9	COL9	2.74822	0.446362
10	COL12	5.16335	2.21505			10	COL10	3.64518	2.62048
11	COL13	5.73919	1.52225			11	COL12	3.09881	1.23873
12	COL15	3.51359	0.512637			12	COL16	2.88219	0.675927
Sampling time: Mar 17						Sampling time: Mar 17
	colony	mean	sd				colony	mean	sd
1	COL2	4.09762	0.77354			1	COL1	5.61245	2.67594
2	COL3	4.23501	2.23398			2	COL2	6.24225	1.22324
3	COL4	3.22536	0.866076			3	COL3	3.49428	1.07008
4	COL5	3.86758	1.28431			4	COL4	3.36755	1.15016
5	COL6	5.84363	1.18578			5	COL5	3.53878	0.788959
6	COL7	3.83497	0.914445			6	COL6	2.54696	0.404458
7	COL9	4.17819	2.22708			7	COL7	3.19128	0.838787
8	COL10	2.81946	1.76071			8	COL8	5.2622	2.93418
9	COL11	2.95863	0.624947			9	COL9	2.1028	1.05681
10	COL12	3.85205	1.16719			10	COL10	5.43451	2.58349
11	COL13	5.06665	1.00083			11	COL11	3.97695	1.67498
12	COL15	4.69327	1.73281			12	COL16	2.37835	0.946392

## Sheet: Chl a
Chlorophyll a concentration per symbiont
Mean values per sampling						Mean values per site
	date	site	mean	sd			site	mean	sd
1	2016-08-01	VS	0.75658	0.410014		1	VS	0.920292	0.524122
3	2016-12-01	VS	1.22351	0.616093		2	SS	1.28438	0.78064
5	2017-03-01	VS	0.774929	0.376068
2	2016-08-01	SS	0.741978	0.417653
4	2016-12-01	SS	1.98538	0.767719
6	2017-03-01	SS	1.08057	0.481605
Mean values in VS						Mean values in SS
Sampling time: Aug 16						Sampling time: Aug 16
	colony	mean	sd				colony	mean	sd
1	COL2	0.436183	0.282309			1	COL1	0.672255	0.360865
2	COL3	1.18961	0.639708			2	COL2	0.540407	0.415073
3	COL4	0.287839	0.122447			3	COL3	0.361034	0.189985
4	COL5	0.786254	0.250163			4	COL4	0.953821	0.250433
5	COL6	0.796617	0.188068			5	COL5	0.422333	0.257627
6	COL7	0.531336	NA			6	COL6	1.07706	0.466079
7	COL9	0.802638	0.564305			7	COL8	0.673418	0.357329
8	COL10	1.04906	0.4034			8	COL9	0.635898	0.316225
9	COL11	0.763546	0.258227			9	COL11	1.06572	0.637852
10	COL12	0.994125	0.336228			10	COL12	0.943877	0.412235
11	COL13	0.699545	0.273657			11	COL16	0.815941	0.307074
12	COL15	0.562013	0.29859
Sampling time: Dec 16						Sampling time: Dec 16
	colony	mean	sd				colony	mean	sd
1	COL2	1.15894	0.492399			1	COL1	1.62465	0.642097
2	COL3	1.33093	0.483127			2	COL2	2.08707	0.718298
3	COL4	0.937495	0.414394			3	COL3	1.65215	0.661635
4	COL5	1.0564	0.599019			4	COL4	1.44303	0.586936
5	COL6	0.942583	0.567741			5	COL5	2.08353	0.828538
6	COL7	1.85154	0.742478			6	COL6	2.71827	0.664229
7	COL9	1.4648	0.903951			7	COL7	1.94203	0.74491
8	COL10	1.29128	0.565302			8	COL8	1.31978	0.479147
9	COL11	1.51096	0.710148			9	COL9	2.07908	0.446143
10	COL12	0.694192	0.0849247			10	COL10	1.90502	0.78759
11	COL13	0.899116	0.386924			11	COL12	3.03902	0.889206
12	COL15	1.56532	0.573576			12	COL16	1.93092	0.358863
Sampling time: Mar 17						Sampling time: Mar 17
	colony	mean	sd				colony	mean	sd
1	COL2	0.627748	0.290018			1	COL1	0.473737	0.111821
2	COL3	0.52179	0.416826			2	COL2	0.739631	0.173732
3	COL4	0.919818	0.327013			3	COL3	0.894651	0.34564
4	COL5	0.679406	0.0995066			4	COL4	1.89926	0.177371
5	COL6	0.380671	0.0749564			5	COL5	1.11171	0.0713613
6	COL7	0.715806	0.263273			6	COL6	0.983767	0.175827
7	COL9	0.92215	0.542942			7	COL7	0.983539	0.230279
8	COL10	1.19216	0.517025			8	COL8	0.828081	0.637359
9	COL11	0.89532	0.228206			9	COL9	1.48694	0.506648
10	COL12	1.1007	0.343378			10	COL10	0.920725	0.254568
11	COL13	0.74065	0.267242			11	COL11	1.26651	0.227473
12	COL15	0.602924	0.235594			12	COL16	1.37832	0.612894

## Sheet: qPCR.colony
qPCR mean values per colony
VS	2016-08-01		2016-12-01		2017-03-01
Colony	Durusdinium	Cladocopium	Durusdinium	Cladocopium	Durusdinium	Cladocopium	Total %Durusdinium:
COL2	99.8644	0.135597	99.5071	0.49288	99.8942	0.105842	99.7552
COL3	99.8301	0.169865	100	0	99.9879	0.0120598	99.9394
COL4	99.6326	0.367429	99.4098	0.590187	99.9715	0.0285212	99.6713
COL5	98.5281	1.47194	99.9504	0.0495888	99.7612	0.238771	99.4132
COL6	99.2746	0.725357	99.3766	0.623414	99.6777	0.322258	99.443
COL7	99.6222	0.377841	99.9451	0.054852	99.9686	0.031421	99.8453
COL9	99.3108	0.689176	99.9266	0.0733919	99.8	0.2	99.6791
COL10	53.6578	46.3422	86.8	13.2	76.5644	23.4356	72.3407
COL11	99.5221	0.477901	98.3998	1.60024	99.4097	0.590255	99.1105
COL12	100	0	99.4056	0.594372	99.9622	0.0377975	99.7893
COL13	99.9281	0.0719491	98.7708	1.22922	99.7953	0.204719	99.498
COL15	93.8914	6.10855	96	4	91.9178	8.08223	93.9364
SS	2016-08-01		2016-12-01		2017-03-01
Colony	Durusdinium	Cladocopium	Durusdinium	Cladocopium	Durusdinium	Cladocopium	Total %Durusdinium:
COL1	56.7747	43.2253	55.6601	44.3399	85.8043	14.1957	66.0797
COL2	73.0199	26.9801	88.0664	11.9336	89	11	83.3621
COL3	97.1119	2.8881	92.2848	7.71519	66.2	33.8	85.1989
COL4	12.1373	87.8627	21.0464	78.9536	2.6	97.4	11.9279
COL5	0.165335	99.8347	0.528586	99.4714	0	100	0.231307
COL6	0.0220878	99.9779	0.0293738	99.9706	0	100	0.0171539
COL7	Not sampled	Not sampled	0.095002	99.905	0.2	99.8	0.098334
COL8	99.6755	0.324526	99.9512	0.048754	100	0	99.8756
COL9	0.116465	99.8835	0.0259651	99.974	0	100	0.0474765
COL10	Not sampled	Not sampled	0.0460239	99.954	0	100	0.0153413
COL11	0.0287447	99.9713	Not sampled	Not sampled	0	100	0.00958155
COL12	Not sampled	Not sampled	0.00999275	99.99	0.0870556	99.9129	0.0323495
COL16	18.8701	81.1299	24	76	36.4	63.6	26.4234
